1 *Successful mating and hybridisation in two closely related flatworm species*

2 *despite significant differences in reproductive morphology and behaviour*

3

4

5 Pragma Singh<sup>\*1</sup>, Daniel Ballmer<sup>1,2</sup>, Max Laubscher<sup>1</sup> and Lukas Schärer<sup>1</sup>

6 <sup>1</sup>Zoological Institute, Evolutionary Biology, University of Basel, Basel, Switzerland

7 <sup>2</sup>Friedrich Miescher Institute for Biomedical Research, Basel, Switzerland

8

9 \*Corresponding Author:

10 Email: [pragya.singh42019@gmail.com](mailto:pragya.singh42019@gmail.com)

11 ORCID: <https://orcid.org/0000-0002-7411-3206>

12 University of Basel, Zoological Institute, Evolutionary Biology, Vesalgasse 1, 4051 Basel,

13 Switzerland

14

15 **Running title:** Hybridisation between two closely related species

16 **Author Contributions:** PS and LS designed the experiments. DB and ML collected the data

17 for the mate preference experiment, while PS conducted and collected the data for the other

18 experiments. PS analysed the data and wrote the first draft of the manuscript, with input from

19 LS and DB. All authors read and approved the final version.

20

21 **Acknowledgements:**

22 We would like to thank Tim Janicke and Georgina Rivera Ingraham for help with collecting  
23 specimens of the study species *M. janickei*, Steven A. Ramm for providing access to the  
24 images of the *M. lignano* stylets from their study, Jeremias Brand for help with imaging the  
25 hybrid morphology, Nikolas Vellnow and Axel Wiberg for helpful discussions, and Gudrun  
26 Viktorin, Lukas Zimmerman, Jürgen Hottinger, Urs Stiefel and Daniel Lüscher for technical  
27 support. This research was supported by grant 31003A-162543 of the Swiss National Science  
28 Foundation (SNSF) to LS.

29

30 **Data accessibility:** All data in this manuscript will be deposited online on Zenodo (xx).

31

32

33 ***Abstract***

34 Speciation is usually a gradual process, in which reproductive barriers between two species  
35 accumulate over time. Reproductive traits, like genital morphology and mating behaviour, are  
36 some of the fastest diverging characters and can serve as reproductive barriers. The free-living  
37 flatworm *Macrostomum lignano*, an established model for studying sex in hermaphrodites,  
38 and its congener *M. janickei* are closely related, but differ substantially in their male  
39 intromittent organ (stylet) morphology. Here, we examine whether these morphological  
40 differences are accompanied by differences in behavioural traits, and whether these could  
41 represent barriers to successful mating and hybridization between the two species. Our data  
42 shows that the two species differ in many aspects of their mating behaviour, with *M. janickei*  
43 having a five-fold longer copulation duration, copulating less frequently, and having a longer  
44 and more delayed suck behaviour (a postcopulatory behaviour likely involved in sexual  
45 conflict). Interestingly, and despite these significant morphological and behavioural  
46 differences, the two species mate readily with each other in heterospecific pairings, often  
47 showing behaviours of intermediate duration. Although both species have similar fecundity in  
48 conspecific pairings, the heterospecific pairings revealed clear postmating barriers, as only  
49 few heterospecific pairings produced F1 hybrids. These hybrids had a stylet morphology that  
50 was intermediate between that of the parental species, and they could successfully backcross  
51 to both parental species. Finally, in a mate choice experiment we tested if the worms  
52 preferentially mated with conspecifics over heterospecifics, since such a preference could  
53 represent a premating barrier. Interestingly, the experiment showed that the nearly two-fold  
54 higher mating rate of *M. lignano* caused it to mate more with conspecifics, leading to  
55 assortative mating, while *M. janickei* ended up mating more with heterospecifics. Thus, while  
56 the two species can hybridize, the mating rate differences could possibly lead to higher fitness  
57 costs for *M. janickei* compared to *M. lignano*.

58 ***Keywords***

59 mating behaviour, simultaneous hermaphrodite, mate preference, reproductive isolation,  
60 hybridization, genitalia, reproductive barriers, premating barriers, postmating barriers, free-  
61 living flatworms

62

## 63 ***Introduction***

64 The biological species concept defines species as groups of individuals that interbreed in  
65 nature to produce viable and fertile offspring (Mayr 1942; Coyne and Orr 2004). They are  
66 usually isolated from interbreeding with other species by reproductive barriers, though in  
67 some cases they remain capable of producing hybrid offspring with closely related species.  
68 Accordingly, an important step for the origin and maintenance of species is the evolution of  
69 reproductive barriers, which are usually split into prezygotic and postzygotic barriers (Butlin  
70 et al. 2012; Ostevik et al. 2016; Lackey and Boughman 2017; Sato et al. 2018). While  
71 prezygotic barriers involve the prevention of zygote formation, postzygotic barriers lead to  
72 zygote mortality, or inviable or sterile hybrid offspring that are unable to pass on their genes.  
73 Moreover, prezygotic barriers can be ecological, temporal, behavioural, mechanical or  
74 gametic, and can be further subdivided into premating barriers and postmating-prezygotic  
75 barriers. Premating barriers act to prevent the occurrence of heterospecific matings. For  
76 example, if a species has a mating preference for conspecific partners over heterospecifics,  
77 this mating preference can lead to assortative mating between conspecifics and thereby  
78 function as a premating barrier (Williams and Mendelson 2010; Ciccotto et al. 2013; Zhou et  
79 al. 2015). Postmating-prezygotic barriers often involve conspecific sperm precedence due to  
80 postcopulatory processes, such as sperm competition and cryptic female choice, or they can  
81 result from an incompatibility of female reproductive organs with heterospecific male  
82 ejaculate (Manier et al. 2013; Soudi et al. 2016; Firman et al. 2017; Devigili et al. 2018;  
83 Garlovsky and Snook 2018; Turissini et al. 2018). However, in studies of internally fertilizing  
84 species it can often be difficult to distinguish whether the barrier is prezygotic (e.g. if despite  
85 mating, heterospecific sperm is not transferred or lost in the female reproductive tract) or  
86 postzygotic (e.g. if any resulting zygotes do not develop properly).

87 Species in the early stages of divergence will often not have complete reproductive barriers  
88 between them, but as they diverge in their traits, more reproductive barriers usually  
89 accumulate over time, since these divergent traits can function as barriers. Reproductive traits  
90 may diverge particularly quickly, since they are the primary targets of sexual selection, often  
91 leading to rapid accumulation of phenotypic differences (Eberhard 1985; Arnqvist 1997;  
92 Swanson and Vacquier 2002; Gröning and Hochkirch 2008). Therefore, sexual selection can  
93 play an important role in evolutionary diversification, reproductive isolation and speciation  
94 (Kraaijeveld et al. 2011; Janicke et al. 2018 but see Morrow et al. 2003). This is supported by  
95 the fact that reproductive traits, such as mating behaviour and genital morphology, have been  
96 shown to diversify faster than other traits (Arnqvist 1998; Gleason and Ritchie 1998;  
97 Puniamoorthy et al. 2009, 2010; Puniamoorthy 2014) and can differ markedly even between  
98 recently diverged species (Schärer et al. n.d.; Anthes and Michiels 2007; Puniamoorthy et al.  
99 2009, 2010; Kelly and Moore 2016), and sometimes even between populations of the same  
100 species (Herring and Verrell 1996; Klappert et al. 2007; Puniamoorthy 2014). Moreover,  
101 some studies have shown that mating behaviour might evolve even more quickly than genital  
102 morphology (Puniamoorthy 2014). Thus, a rapidly evolving reproductive trait like  
103 reproductive behaviour can represent a premating barrier by being involved in mate  
104 recognition and assortative mating (Herring and Verrell 1996; Ritchie et al. 1999), while a  
105 difference in genital morphology can prevent successful mating and thus represent a  
106 mechanical barrier (Masly 2012; Barnard et al. 2017).

107 In recently diverged species that occur in sympatry, selection may occur to reduce the  
108 likelihood of heterospecific reproductive interactions, whenever such interactions lower  
109 individual fitness (either directly or via low fitness hybrids). This selection can cause greater  
110 divergence in reproductive traits, leading to reproductive character displacement (Brown and  
111 Wilson 1956; Blair 1974; Butlin and Ritchie 1994; Servedio and Noor 2003; Pfennig and

112 Pfennig 2009) and reinforcement of reproductive isolation. An interesting question that arises  
113 then is whether differences in reproductive traits correlate in recently diverged species, for  
114 instance, do differences in reproductive morphology correlate with differences in reproductive  
115 behaviour? And are these differences sufficiently large to function as prezygotic reproductive  
116 barriers, leading to reproductive isolation? Under a scenario of reinforcement in sympatry, we  
117 might expect that divergent reproductive traits will serve as fairly effective reproductive  
118 barriers (though not all sympatric species will necessarily be completely reproductively  
119 isolated). In contrast, species that have speciated in allopatry may lack (complete)  
120 reproductive isolation due to incomplete pre- or postzygotic barriers, despite having diverged  
121 in their reproductive traits. Secondary contact between such species may then result in the  
122 production of viable and potentially even fertile hybrid offspring.

123 Even in the absence of successful hybridization, both heterospecific mating attempts and  
124 actual heterospecific matings can result in wastage of energy, resources, time and/or gametes.  
125 This can lead to reproductive interference, which is defined as heterospecific reproductive  
126 activities that reduce the fitness of at least one of the species involved (Gröning and  
127 Hochkirch 2008; Kyogoku 2015; Grether et al. 2017; Shuker and Burdfield-Steel 2017).  
128 Interestingly, reproductive interference may be asymmetric, in that the fitness of one species  
129 is affected to a greater extent than that of the other (Gröning and Hochkirch 2008).

130 In our study, we investigated reproductive barriers and reproductive interference in two  
131 species of the free-living flatworm genus *Macrostomum*, namely *M. lignano*, an established  
132 model for studying sexual reproduction in hermaphrodites (Ladurner et al. 2005), and the  
133 recently described *M. janickei*, the currently most closely related congener known (Schärer et  
134 al. n.d.). Specifically, we examined if differences in the stylet morphology between these  
135 species correlated with differences in their mating behaviour and if they had similar fecundity.  
136 Furthermore, we investigated the potential for hybridization between the two species, and

137 tested whether the resulting hybrids were fertile. Next, using geometric morphometrics we  
138 compared the stylet morphology of the parental species and the hybrids. Finally, we  
139 performed a mate choice experiment to test if individuals preferentially mated with  
140 conspecifics over heterospecifics, since this form of assortative mating could serve as a  
141 pre-mating barrier between these two closely related species in a putative zone of sympatry.

## 142 ***Materials and Methods***

### 143 ***Study organisms***

144 *Macrostomum lignano* Ladurner, Schärer, Salvenmoser and Rieger 2005 and *M. janickei*  
145 Schärer in press are free-living flatworm species (Macrostomorpha, Platyhelminthes) found in  
146 the upper intertidal meiofauna of the Mediterranean Sea (Schärer et al. n.d.; Ladurner et al.  
147 2005; Zadesenets et al. 2016, 2017). Despite being very closely related sister species (Schärer  
148 et al. n.d.), the morphology of their stylet is clearly distinct (see Figure 4 and results).  
149 *M. lignano* has a stylet that is "slightly curved, its distal opening [having a] slight asymmetric  
150 thickening" (Ladurner et al. 2005), while *M. janickei* has a more complex stylet that is a "long  
151 and a gradually narrowing funnel that includes first a slight turn (of ~40°) and then a sharp  
152 turn (of >90°) towards the distal end [...], giving the stylet tip a hook-like appearance."  
153 (Schärer et al. n.d.).

154 Previous studies have shown that *M. lignano* is an outcrossing, reciprocally copulating  
155 species with frequent mating (on average about 6 copulations per hour, Schärer et al. 2004).  
156 Specifically, reciprocal copulation consists of both partners mating in the male and female  
157 role simultaneously, with reciprocal insertion of the stylet into the female antrum (the sperm-  
158 receiving organ) of the partner, and transfer of ejaculate consisting of both sperm and seminal  
159 fluids. Copulation is then often followed by a facultative postcopulatory suck behaviour  
160 (Schärer et al. 2004, 2011; Vizoso et al. 2010), during which the worm bends onto itself and



161 places its pharynx over its own female genital opening, while appearing to suck. This  
162 behaviour is thought to represent a female resistance trait that has evolved due to sexual  
163 conflict over the fate of received ejaculate. Specifically, it is likely aimed at removing  
164 ejaculate components from the antrum, and sperm is often seen sticking out of the antrum  
165 after a suck (Marie-Orleach et al., 2013; Schärer et al., 2011; Schärer et al., 2004; Vizoso et  
166 al., 2010).

167 The individuals of *M. lignano* used in this experiment were either from the outbred LS1  
168 culture (Marie-Orleach et al. 2013) or from the transgenic outbred BAS1 culture, which was  
169 created by backcrossing the GFP-expressing inbred HUB1 line (Janicke et al. 2013; Marie-  
170 Orleach et al. 2014) onto the LS1 culture (Marie-Orleach et al. 2016), subsequently cleaned  
171 from a karyotype polymorphism that segregates in HUB1 (Zadesenets et al. 2016, 2017), and  
172 finally bred to be homozygous GFP-positive (Vellnow et al. 2018). The *M. janickei* worms  
173 used were from a culture that was established using individuals collected from Palavas-les-  
174 Flots, near Montpellier, France (Schärer et al. n.d.; Zadesenets et al. 2016, 2017). Both  
175 species are kept in mass cultures in the laboratory at 20 °C in glass Petri dishes containing  
176 either f/2 medium (Andersen et al. 2007) or 32‰ artificial sea water (ASW) and fed with the  
177 diatom *Nitzschia curvilineata*.

## 178 ***Experimental design***

### 179 ***Experiment 1: Reproductive behaviour and hybridization***

180 On day 1, for each species, we distributed 240 adult worms over 4 petri dishes with algae and  
181 ASW (using the transgenic BAS1 culture for *M. lignano*). On day 4, we removed the adults,  
182 such that the eggs were laid over a 3-day period, and the age of the resulting hatchlings did  
183 not differ by more than 3 days. On day 9 (i.e. well before the worms reach sexual maturity),  
184 we isolated these hatchlings in 24-well tissue culture plates (TPP, Switzerland) in 1 ml of

185 ASW with *ad libitum* algae. Starting on day 34 and spread over 3 subsequent days, we then  
186 examined the mating behaviour by pairing these previously isolated and by then adult worms  
187 (as judged by their visible testes and ovaries) in one of three pairing types, namely *M. lignano*  
188 pairs (*M. lignano* x *M. lignano*, n = 57), *M. janickei* pairs (*M. janickei* x *M. janickei*, n = 57),  
189 or heterospecific pairs (*M. lignano* x *M. janickei*, n = 57).

190 Each observation chamber (Schärer et al. 2004) was assembled by placing 9 mating pairs (3  
191 pairs of each pairing type) in drops of 3  $\mu$ l of ASW each between two siliconized microscope  
192 slides separated by 257  $\mu$ m, for a total of 19 observation chambers (i.e. 7, 4, and 8 chambers  
193 on the three subsequent days, respectively). The observation chambers were filmed under  
194 transmitted light for 2h at 1 frame s<sup>-1</sup> with digital video cameras (DFK 41AF02 or DFK  
195 31BF03, The Imaging Source) in QuickTime format using BTV Pro 6.0b7  
196 (<http://www.bensoftware.com/>), and the resulting movies were scored manually frame-by-  
197 frame using QuickTime player. We used two different movie setups for filming the mating  
198 and they differed slightly in the cameras and light sources used.

199 After the two-hour mating period, we isolated both individuals of the heterospecific pairs, and  
200 one randomly chosen individual each of the *M. lignano* and *M. janickei* pairs, respectively, in  
201 24-well plates and subsequently transferred them weekly to new plates. To obtain an estimate  
202 of the (female) fecundity resulting from these pairings the offspring production of these  
203 maternal individuals was followed and counted for 14 days (since worms eventually run out  
204 of stored sperm, Janicke et al. 2011). For each heterospecific pair, the number of (hybrid F1)  
205 offspring produced was averaged over both maternal individuals. And by confirming that all  
206 maternal offspring of the GFP-negative *M. janickei* were GFP-positive, we could ascertain  
207 that the GFP-positive BAS1 *M. lignano* had indeed sired these F1 hybrids. Moreover,  
208 previous experiments had shown that neither species self-fertilizes over a comparable

209 observation period (Schärer and Ladurner 2003; Singh et al. 2019), thus any offspring  
210 produced in the heterospecific pairs must have resulted from outcrossing with the partners.

211 For each mating pair, we scored the movie up to the fifth copulation and observed the  
212 following copulation traits: copulation latency (i.e. time to first copulation), copulation  
213 duration, copulation interval, time of suck (after copulation), suck duration, and the number of  
214 sucks, while being blind with respect to both the pairing type and the species identity of  
215 individuals in the heterospecific pairs (note that the GFP-status of a worm cannot be  
216 determined under normal transmitted light). The decision to observe the behaviour up to and  
217 including the fifth copulation was made *a priori* (see also Marie-Orleach et al. 2013), and was  
218 motivated by our desire to get accurate estimates for each behaviour, by averaging all traits  
219 (except copulation latency) over this period for each pair and to keep the total observation  
220 time manageable. The copulation behaviour was defined as in Schärer et al. (2004), and the  
221 copulatory duration was measured starting from the frame when the pair was first tightly  
222 interlinked (like two small interlocking G's) with the tail plates in close ventral contact, to the  
223 frame where their tail plates were no longer attached to each other. We scored a behaviour as  
224 a copulation only if the pair was in this interlinked position for at least 5 seconds. The  
225 copulation interval was measured as the duration between the end of a copulation to the start  
226 of the next copulation. The time of suck was measured (for sucks that followed a copulation,  
227 observed up to the fifth copulation) as the time elapsed between the end of the copulation  
228 preceding the suck and the start of the suck in question. The suck duration was measured from  
229 the frame where the pharynx was placed on the female genital opening up to the frame where  
230 the pharynx disengaged. The number of sucks was measured as the number of sucks observed  
231 up to the fifth copulation. The copulation duration, copulation interval, time of suck, and suck  
232 duration was averaged over all occurrences in a replicate.

233 The final sample sizes varied for the different behavioural traits, depending on how many  
234 replicates exhibited the particular trait of interest. We, respectively, excluded 3, 7 and 2  
235 replicates of the *M. lignano* pairs, heterospecific pairs and *M. janickei* pairs from all analyses,  
236 since these replicates showed no copulations. In addition, 3 replicates of *M. janickei* had only  
237 one copulation, so we could not calculate the copulation interval for these drops. Moreover, in  
238 some replicates there were no sucks, which reduced our sample size for the time of suck and  
239 suck duration. The suck is considered a postcopulatory behaviour, and we therefore might not  
240 expect an individual to exhibit the postcopulatory behaviour unless it copulates. Thus, to  
241 examine if the number of sucks differed between the pairing types, we considered only the  
242 subset of drops in which we observed at least five copulations. Additionally, for offspring  
243 number we lost 2 replicates each for the *M. lignano* and *M. janickei* pairs. The final sample  
244 sizes are given in the respective figures.

#### 245 ***Experiment 2: Hybrid fertility***

246 We assessed the fertility of the F1 hybrid offspring from experiment 1, by pairing for 7 days a  
247 subset of the virgin hybrids with, respectively, virgin adult *M. lignano* (n = 24) or virgin adult  
248 *M. janickei* (n = 24) partners (grown up under identical conditions as the parents, but using  
249 the wildtype LS1 culture for *M. lignano*) and then isolating both the hybrids and their partners  
250 for 14 days to determine offspring number. By confirming that at least some of the F2  
251 offspring from the crosses between the GFP-heterozygote F1 hybrids and the GFP-negative  
252 parents were GFP-positive, we could ascertain that we were indeed seeing successful  
253 backcrosses. We did not statistically analyse if offspring number differed depending on which  
254 parental species the hybrid was backcrossed onto, as the hybrids used were not statistically  
255 independent (e.g. some of them were siblings). Thus, we only descriptively examined  
256 offspring number produced from the backcrossing.

257 ***Experiment 3: Hybrid and parental species stylet morphology***

258 To investigate the stylet morphology of the F1 hybrids, we compared the stylets of isolated  
259 virgin hybrids (n = 29; measured before the backcrossing experiment), to those of isolated  
260 *M. lignano* (n=25, from Ramm et al. 2019) and *M. janickei* (n=18, from Singh et al. 2019),  
261 using a geometric morphometrics landmark-based method (Zelditch et al. 2004). Briefly,  
262 worms were relaxed using a solution of MgCl<sub>2</sub> and ASW, and dorsoventrally squeezed  
263 between a glass slide and a haemocytometer cover glass using standardised spacers (40 µm).  
264 Stylet images were then obtained at 400x magnification (Figure 4a-c), with a DM 2500  
265 microscope (Leica Microsystems, Heerbrugg, Switzerland) using a digital camera  
266 (DFK41BF02, The Imaging Source, Bremen, Germany) connected to a computer running  
267 BTV Pro 6.0b7 (Ben Software). For geometric morphometrics, we placed a total of 60  
268 landmarks on each stylet, two fixed landmarks each on the tip and base of the stylet and 28  
269 equally spaced sliding semi-landmarks each along the two curved sides of the stylet between  
270 the base and the tip (Figure 4d-f), using tpsDig 2.31 (F. James Rohlf, 2006, Department of  
271 Ecology and Evolution, SUNY, <http://life.bio.sunysb.edu/morph/>), while being blind to the  
272 identity of the individual. Note that this landmark placement differs somewhat from that used  
273 earlier in *M. lignano* (Janicke and Schärer 2009) on account of the different morphology of  
274 the *M. janickei* stylet. Specifically, landmarks should represent homologous points on a  
275 morphological structure, and we here defined only four fixed landmarks that could be  
276 recognised in the F1 hybrids and both parental species (compared to six in *M. lignano* earlier),  
277 while more sliding semi-landmarks were used here to approximate the considerably more  
278 complex shape of the *M. janickei* stylet (i.e. 56 semi-landmarks now vs. 18 in *M. lignano*  
279 earlier). We always placed landmarks 1-30 on the stylet side that was further from the seminal  
280 vesicle (the sperm storage organ located near the stylet), while landmarks 31-60 were placed  
281 on the stylet side that was closer to the seminal vesicle (see Figure 4d-f). Also, to ensure that

282 the orientation of the seminal vesicle and stylet with respect to the viewer was similar across  
283 all images, we mirrored the images for some specimens. We used tpsRelw 1.70  
284 (<http://life.bio.sunysb.edu/morph/>) to analyse the resulting landmark configurations and  
285 extract the centroid size (an estimate of the size of the landmark configuration that can serve  
286 as a measure of the stylet size) and the relative warp scores (which decompose the total shape  
287 variation into major axes of shape variation). Our analysis yielded 71 relative warp scores, of  
288 which the first three relative warp scores explained 88% of all variation in stylet shape. For  
289 our statistical analysis, we here only focus on the first relative warp score (RWS1), as it  
290 explained 64% of the shape variation and captured the most drastic change in the stylet shape,  
291 including the extent of the stylet tip curvature (Figure 4g-i).

#### 292 ***Experiment 4: Mate preference experiment***

293 We assessed the mate preferences of *M. lignano* (BAS1) and *M. janickei* by joining two  
294 individuals of each species in 3  $\mu$ l drops of ASW (for a total of 4 individuals per drop). In  
295 each of the four drops per observation chamber, the individuals of either one or the other  
296 species were dyed in order to permit distinguishing the species visually in the movies (i.e.  
297 *M. lignano* or *M. janickei* were dyed in two drops each per mating chamber). We dyed the  
298 worms by exposing them to a solution of the food colour Patent Blue V (Werner Schweizer  
299 AG, Switzerland, at 0.25 mg/ml of 32‰ ASW) for 24h. Patent Blue V does not affect the  
300 mating rate of *M. lignano* (Marie-Orleach et al. 2013), or of *M. janickei*, as the mating rate of  
301 dyed and undyed worms was similar (see Supplementary Figure S1).

302 In total, we constructed 17 observation chambers and filmed them under transmitted light for  
303 2h at 1 frame  $s^{-1}$  (as outlined above), and the resulting movies were scored manually frame-  
304 by-frame using QuickTime player, while being blind to which species was dyed. For each  
305 drop, we determined the copulation type of the first copulation, i.e. conspecific *M. lignano*,

306 conspecific *M. janickei* or heterospecific (*M. lignano* x *M. janickei*), and we also estimated  
307 the copulation frequencies of the three copulation types over the entire 2h period.

308 Out of the total 68 filmed drops we had to exclude 9 drops, 5 of which had an injured worm  
309 and 4 of which (one entire observation chamber) had dim lighting that made it difficult to  
310 distinguish the dyed worms. Thus, our final sample size was 59 drops.

### 311 *Statistical Analyses*

312 In experiment 1, we constructed one-way ANOVAs with the pairing type (*M. lignano* pairs,  
313 heterospecific pairs, and *M. janickei* pairs) as the independent fixed factor, and using  
314 copulation latency, average copulation duration, average copulation interval, average time of  
315 suck, and average suck duration as the dependent variables, followed by post-hoc  
316 comparisons between the pairing types using Tukey's honest significant difference (HSD)  
317 tests. Note that all conclusions remained unchanged if the two movie setups were included as  
318 a factor (data not shown). Data was visually checked for normality and homoscedasticity and  
319 log-transformed for all the above variables. For average time of suck, however, we added 1 to  
320 each data point before log-transformation, to avoid infinite values, since some sucks began  
321 immediately after copulation, leading to zero values. For the number of sucks and the  
322 offspring number we used Kruskal-Wallis tests (since these data could not be appropriately  
323 transformed to fulfil the assumptions for parametric tests), followed by post-hoc tests using  
324 Mann-Whitney-Wilcoxon tests with Bonferroni correction. Moreover, for all behaviours we  
325 calculated the coefficient of variation (CV) to evaluate how stereotypic the behaviour is for  
326 each pairing type. For all behaviours (except for the number of sucks), we calculated the CV  
327 for log-transformed data using the formula  $CV = 100 \times \sqrt{e^{\text{standard deviation}^2} - 1}$  (Canchola  
328 2017), while for number of sucks we calculated the CV for raw data using  $CV =$   
329  $\frac{\text{standard deviation}}{\text{mean}} \times 100$ .

330 In experiment 3, we constructed one-way ANOVAs with the types of worm (*M. lignano*,  
331 *M. janickei*, or hybrid) as the independent fixed factor, and the centroid size and RWS1 as the  
332 dependent variables, followed by post-hoc comparisons using Tukey's HSD. Note that these  
333 analyses need to be interpreted with some care, since the three groups we compared were not  
334 grown and imaged as part of the same experiment (though using the same methodology).

335 In experiment 4, three different copulation types could occur (i.e. *M. lignano* conspecific,  
336 heterospecific, and *M. janickei* conspecific), and to generate a null hypothesis of the expected  
337 proportions of each copulation type, we initially assumed random mating and hence no  
338 mating preference for either conspecific or heterospecific individuals in either species. Thus,  
339 under these assumptions the null hypothesis for the expected proportion of drops having these  
340 different copulation types as the first copulation was: *M. lignano* conspecific : heterospecific :  
341 *M. janickei* conspecific = 0.25 : 0.50 : 0.25. For each copulation type, we then determined the  
342 observed proportion of drops in which it was the first copulation, and examined if these  
343 proportions differed significantly from this null hypothesis, using a Chi-square goodness-of-  
344 fit test.

345 Next, we looked at the observed proportion of the three copulation types within each drop and  
346 across all drops, and as the null hypothesis we again used the same expected proportions as  
347 above. To test if the observed proportion of the three copulation types differed from this null  
348 hypothesis, we used repeated G-tests of goodness-of-fit (McDonald 2014), an approach that  
349 involves sequential tests of up to four different hypotheses, which, depending on the obtained  
350 results, will not all necessarily be carried out. The first hypothesis tests if the observed  
351 proportions within each drop fit the expectations. The second hypothesis examines if the  
352 relative observed proportions are the same across all drops by calculating a heterogeneity  
353 value. The third hypothesis examines if the observed proportion matches the expectation  
354 when the data is pooled across all drops. And finally, the fourth hypothesis examines if



355 overall, the data from the individual drops fit our expectations using the sum of individual G-  
356 values for each replicate (obtained from testing the first hypothesis). Following this approach,  
357 we first calculated a G-test goodness-of-fit (with Bonferroni correction) for each drop.  
358 Second, this was followed by a G-test of independence on the data in order to obtain a  
359 ‘heterogeneity G-value’, which permits to evaluate if the drops differ significantly from each  
360 other. Since, this test revealed significant heterogeneity between the drops (see results), we  
361 did not pool the data or proceed with the remaining two tests, but instead drew our conclusion  
362 from the above G-tests of goodness-of-fit (corrected for multiple testing).

363 As we show in the results, in most drops, the majority of copulations were of the *M. lignano*  
364 conspecific type, followed by the heterospecific type (Figure 6a). To check whether this could  
365 be due to an intrinsically higher mating rate of *M. lignano* (see results), we generated a new  
366 null hypothesis that takes the observed mating rates of both *M. lignano* and *M. janickei* into  
367 account. For each drop, we therefore first calculated the mating rate of *M. lignano* as

$$p = \frac{2m_{LL} + m_{LJ}}{2m_T}$$

368 and similarly, the mating rate of *M. janickei* as

$$q = \frac{2m_{JJ} + m_{LJ}}{2m_T}$$

369 Where,  $m_{LL}$ ,  $m_{LJ}$ , and  $m_{JJ}$ , represent the observed numbers of *M. lignano* conspecific,  
370 heterospecific, and *M. janickei* conspecific copulations, and  $m_T$  represents the total number of  
371 copulations (i.e. summed across all copulation types). Thus, we obtained a  $p$  and  $q$  value for  
372 each drop and if both species had the same mating rate, then we would expect  $p = q = 0.5$ .  
373 However, the results of the above analysis showed that *M. lignano* and *M. janickei* differed  
374 greatly in their mating rates (Figure 6b).

375 We, for each drop, therefore calculated the expected numbers of the different copulation  
376 types, given the observed mating rates  $p$  and  $q$  as

$$e_{LL} = p^2 m_T$$

$$e_{LJ} = 2pqm_T$$

377 and

$$e_{JJ} = q^2 m_T$$

378 respectively, where  $e_{LL}$ ,  $e_{LJ}$ , and  $e_{JJ}$ , represent the expected numbers of *M. lignano*  
379 conspecific, heterospecific, and *M. janickei* conspecific copulations. Using these we then  
380 tested whether the resulting expected proportions were significantly different from the  
381 observed proportions for each drop, using a Chi-square goodness-of-fit test with Bonferroni  
382 correction for multiple testing. This allowed us to examine if the apparent preference of *M.*  
383 *lignano* for mating with conspecifics (i.e. the observed assortative mating) simply stemmed  
384 from the mating rate differences between the species, as opposed to a more explicit preference  
385 for conspecific partners.

386 All statistical analyses were carried out in R, version 3.1.1 (R Development Core Team,  
387 2016).

### 388 ***Ethical note***

389 All animal experimentation was carried out in accordance to Swiss legal and ethical  
390 standards.

## 391 **Results**

### 392 **Experiment 1: Reproductive behaviour and hybridization**

393 The three pairing types differed in their mating behaviour, though to varying degrees for the  
394 different copulation traits. Pairing type had a significant effect on copulation latency ( $F_{2,156} =$   
395 4.688,  $P = 0.01$ ; Figure 1a), with *M. lignano* pairs starting to copulate earlier than  
396 heterospecific pairs, while the *M. janickei* pairs had an intermediate copulation latency. The  
397 pairing type also had a significant effect on the copulation duration ( $F_{2,156} = 370.6$ ,  $P < 0.001$ ;  
398 Figure 1b), with *M. janickei* pairs having a nearly five-fold higher copulation duration than  
399 *M. lignano* pairs and heterospecific pairs, which did not significantly differ amongst  
400 themselves. Moreover, the copulation interval was affected by the pairing type ( $F_{2,153} =$   
401 8.124,  $P < 0.001$ ; Figure 1c). *M. janickei* pairs had a significantly longer interval between  
402 copulations than *M. lignano* pairs, while the heterospecific pairs had intermediate copulation  
403 interval.

404 For the suck behaviour, very few heterospecific replicates exhibited the behaviour, leading to  
405 a reduction in our sample size for the time of suck and suck duration (Figure 2). The time of  
406 suck (after copulation) differed between the pairing types ( $F_{2,92} = 48.15$ ,  $P < 0.001$ ; Figure  
407 2a), with *M. lignano* pairs usually sucking almost immediately after copulation, while the  
408 *M. janickei* pairs and heterospecific pairs took a longer time to start sucking. The suck  
409 duration was also significantly affected by the pairing type ( $F_{2,92} = 7.80$ ,  $P < 0.001$ ; Figure  
410 2b), with *M. janickei* pairs having a longer suck duration than *M. lignano* pairs, while the  
411 heterospecific pairs did not significantly differ from the other two pairing types. Interestingly,  
412 the number of sucks was significantly affected by the pairing type (Kruskal–Wallis test:  $\chi^2 =$

413 41.16,  $df = 2$ ,  $P < 0.001$ ; Figure 2c), with *M. lignano* pairs sucking most frequently, followed  
414 by the *M. janickei* pairs. The heterospecific pairs sucked least frequently.

415 Remarkably, for most behaviours the heterospecific pairs had the highest CV, suggesting that  
416 heterospecific behaviour was relatively variable and less stereotypic than conspecific  
417 behaviour (Table 1).

418 In addition, while heterospecific pairs were capable of producing hybrid offspring—a new  
419 finding for this genus—they produced significantly fewer offspring than conspecific pairs  
420 (Kruskal–Wallis test:  $\chi^2 = 48.04$ ,  $df = 2$ ,  $P < 0.001$ ; Figure 3a), which had a comparable  
421 fecundity. Out of the 10 heterospecific replicates that produced hybrids, in 6 replicates only  
422 the *M. lignano* parent produced hybrids while in the other 4 replicates only the *M. janickei*  
423 parent produced offspring. Thus, hybridization was symmetrical, with each species being  
424 capable of inseminating and fertilizing the other.

#### 425 ***Experiment 2: Hybrid fertility***

426 Most of the F1 hybrids were fertile and produced offspring in the wells while paired with  
427 worms from the parental species. Specifically, we found that 19/24 and 14/24 pairs of  
428 *M. lignano* x hybrid and *M. janickei* x hybrid produced hybrid F2 offspring, respectively,  
429 while they were paired with an individual of one of their parental species for 7 days (Figure  
430 3b), while post-pairing, relatively few individuals of either hybrids or parentals produced  
431 offspring in isolation (Figure 3c).

#### 432 ***Experiment 3: Hybrid and parental species stylet morphology***

433 The stylet morphology was significantly different between *M. lignano*, *M. janickei* and the F1  
434 hybrids (Figure 4). The centroid size, an estimate of stylet size, was different between the  
435 groups ( $F_{2,69} = 33.26$ ,  $P < 0.001$ ; Figure 5a), with the F1 hybrids having a larger centroid size

436 than *M. lignano* and *M. janickei*, which did not differ amongst themselves. The RWS1 of the  
437 stylets, which primarily seemed to capture variation in the curvature of the stylet tip and the  
438 width of the stylet base (Figure 4g-i), was significantly different between all groups ( $F_{2,69} =$   
439 238,  $P < 0.001$ ; Figure 5b), with the RWS1 of the hybrids being intermediate between that of  
440 *M. lignano* and *M. janickei*, indicating that the shape of hybrid stylet was morphologically  
441 intermediate between the parental species.

#### 442 ***Experiment 4: Mate preference experiment***

443 Out of the 59 analysed drops, we found that 34 (57.6%) drops had a *M. lignano* conspecific  
444 copulation as the first copulation, while that was true for only 18 (30.5%) and 7 (11.9%)  
445 drops for heterospecifics and *M. janickei* conspecifics, respectively. These proportions  
446 differed significantly from our null hypothesis under random mating (Chi-square goodness-  
447 of-fit test:  $\chi^2 = 33.68$ ,  $df = 2$ ,  $P < 0.001$ ).

448 With respect to the observed proportion of the different copulation types within drops, the  
449 data from 55 of the 59 drops (without Bonferroni-correction  $P < 0.05$ , Supplementary Table  
450 S2) differed significantly from the null hypothesis, though after Bonferroni correction that  
451 number dropped to just 46 drops (Bonferroni-corrected  $P < 0.05$ , Supplementary Table S2).

452 Interestingly, we found significant variation in the observed proportion between the drops  
453 ('heterogeneity G-value' = 358.55,  $df = 116$ ,  $P < 0.001$ ), as is also evident from Figure 6a.

454 The general trend was that *M. lignano* conspecific copulations were the most frequent,  
455 followed by heterospecific copulations, while we observed relatively few *M. janickei*  
456 conspecific copulations in most of the drops. In 51 drops, the *M. lignano* conspecific  
457 copulations were the most frequent, while in only one drop was the proportion of *M. janickei*  
458 conspecific copulations the highest (see colours in Figure 6a). Moreover, in five drops, the  
459 highest proportion of copulations was of the heterospecific type, while in two drops,

460 *M. lignano* conspecific and heterospecific copulations jointly had the highest proportion.  
461 Surprisingly, we found that in 52 drops there was a higher proportion of heterospecific  
462 copulations than of *M. janickei* conspecific copulations (with zero *M. janickei* conspecific  
463 copulations in 13 drops), indicating that under these conditions, the *M. janickei* worms mated  
464 more often with a *M. lignano* heterospecific than with a *M. janickei* conspecific individual.  
465 This could either represent a preference in *M. janickei* for mating with *M. lignano*, or it could  
466 potentially also result from *M. lignano* having an intrinsically higher mating rate, which we  
467 explore next.

468 In our mate preference assays, the mating rate of *M. lignano* and *M. janickei* was indeed  
469 different, with *M. lignano* having a much higher mating rate than *M. janickei* (Figure 6b).  
470 When we took the mating rate differences between the two species into account, the Chi-  
471 Square goodness-of-fit test showed that in 55 out of 59 drops the observed and expected  
472 copulation frequencies were not significantly different (Bonferroni-corrected  $P > 0.05$ ,  
473 Supplementary Table S3). This suggests that the difference in the copulation frequencies of  
474 the different copulation types, including the high frequency of heterospecific copulations in  
475 *M. janickei*, is largely explained by the intrinsic differences in mating rate of the two species,  
476 rather than stemming from an explicit preference for heterospecific partners.

## 477 **Discussion**

478 Our study shows that the closely related species *M. lignano* and *M. janickei* differ  
479 significantly, not only in their stylet morphology, but also in several aspects of their mating  
480 behaviour. These considerable morphological and behavioural differences do not, however,  
481 appear to represent strong premating barriers, since the worms were readily able to engage in  
482 heterospecific matings. In contrast, there seem to be significant postmating barriers between  
483 these two species, as only few hybrid offspring were produced from these heterospecific  
484 matings. Moreover, the resulting hybrids were fertile, showing a stylet morphology that was

485 intermediate between the parental species, and capable of backcrossing to both parental  
486 species. Interestingly, the data from our mate preference assay revealed distinct asymmetries  
487 in the mating patterns between the two species. While *M. lignano* clearly engaged  
488 predominantly in conspecific matings, thereby exhibiting assortative mating, *M. janickei*  
489 ended up mating more often with heterospecific individuals, and we suggest that both likely  
490 occurred as a result of the higher mating rate of *M. lignano* compared to *M. janickei*. In the  
491 following, we discuss these results in some more detail.

### 492 ***Experiment 1: Reproductive behaviour and hybridization***

493 A potential factor that could lead to the observed differences in behavioural traits between the  
494 two species is genital morphology. For example, a positive correlation between copulation  
495 duration and structural complexity of the intromittent organ has been reported in New World  
496 natricine snakes (King et al. 2009), wherein the authors hypothesized that the evolution of  
497 elaborate copulatory organ morphology is driven by sexual conflict over the duration of  
498 copulation. Similar to the findings of that study, the nearly five-fold longer copulation  
499 duration of *M. janickei* pairs compared to *M. lignano* pairs could in part be dictated by its  
500 considerably more complex stylet. Moreover, similar to the male genitalia, the female  
501 genitalia are also more complex in *M. janickei* than *M. lignano* (Schärer et al. n.d.). And in  
502 addition to copulation duration, the longer suck duration of *M. janickei* could also be  
503 correlated with the genital complexity, since removal of ejaculate from the more complex  
504 female genitalia might be more difficult and take more time.

505 In addition to genital morphology, both copulatory and post-copulatory behaviour might also  
506 be influenced by the quantity and composition of the ejaculate transferred during copulation.  
507 For example, a larger quantity of ejaculate might be accompanied by a longer copulation  
508 duration, and possibly also a longer suck duration, since the hypothesised function of the suck  
509 behaviour is to remove ejaculate components (Schärer et al. 2004; Vizoso et al. 2010).

510 Moreover, a longer copulation duration might require longer phases of recovery during which  
511 spent ejaculate is replenished, leading to lower copulation frequency and a longer copulation  
512 interval. A previous study in *M. lignano* showed that pairs formed from virgin worms  
513 copulated approximately 1.6x longer than pairs formed from sexually-experienced worms,  
514 and also that individuals that had copulated with virgin partners had a lower suck frequency  
515 compared to individuals that had copulated with sexually-experienced partners (Marie-  
516 Orleach et al. 2013). This led the authors to hypothesize that virgin partners have more own  
517 sperm and seminal fluid available (which both were confirmed), and may thus transfer more  
518 ejaculate than sexually-experienced partners, and that some components of the ejaculate are  
519 aimed at manipulating the partner and preventing it from sucking (Marie-Orleach et al. 2013).  
520 Indeed, studies in *Drosophila* have shown the presence of non-sperm components in the  
521 ejaculate, which can alter the physiology, immunity, life history, and behaviour of the  
522 recipient, causing strong effects on the fitness of both the donor and the recipient (Chapman  
523 2001; Perry et al. 2013; Schwenke et al. 2016; Billeter and Wolfner 2018). Efforts to  
524 elucidate the function of ejaculate components (like seminal-fluid proteins) in *M. lignano*  
525 have recently made considerable progress (Weber et al. 2018; Patlar et al. 2019; Ramm et al.  
526 2019), and it will be interesting to see if these have similar functions.

527 Longer copulation intervals or temporal aspects of sucking (i.e. onset of sucking) could  
528 potentially also result from the action of some transferred ejaculate components that acts as a  
529 relaxant, leading to inactivity and delayed re-mating or delayed sucking. Interestingly, we  
530 noticed that very few individuals in the heterospecific pairs exhibited the suck behaviour,  
531 which could simply result from low or absent ejaculate transfer. It is also conceivable that  
532 sucking is triggered by species-specific ejaculate components and their interaction with the  
533 female reproductive organ, and hence the absence or low amounts of such components could  
534 result in fewer sucks. Alternatively, individuals of one species might be more effective at



535 preventing suck in heterospecific partners, as heterospecific partners may lack coevolved  
536 defences against such ejaculate substances. Similar to our observation, a cross-reactivity study  
537 in the land snail, *Cornu aspersum*, showed that its diverticulum (a part of the female  
538 reproductive system) only responded to the love-dart mucus of some, but not other, land snail  
539 species, pointing towards species-specific effects of accessory gland products (Lodi and  
540 Koene 2016).

541 Moreover, the different behavioural components might be correlated with each other. For  
542 example, there could be a trade-off between the suck duration and suck frequency for  
543 ejaculate removal, such that longer sucks or more frequent sucks serve the same purpose.  
544 Similarly, a longer copulation duration might be accompanied by a longer suck duration and  
545 copulation interval (as discussed above). In support of this, we did see that *M. lignano* pairs  
546 had both a short copulation and suck duration, but a high copulation and suck frequency,  
547 while the converse was true for *M. janickei* pairs. Thus, there can be correlations between  
548 different aspects of reproductive behaviour and morphology, and a large-scale comparative  
549 study of reproductive behaviour and morphology in *Macrostomum* species would help to  
550 improve our understanding of the complexity and evolution of reproductive traits.

551 Heterospecific pairs showed higher CVs compared to the other two pairing types for both  
552 copulation duration and copulation interval, potentially suggesting disagreements over the  
553 optimal copulation duration and copulation frequency in these pairs. In addition,  
554 heterospecific pairs exhibited higher CVs compared to conspecific pairs for all suck related  
555 behaviours. Note that in these movies we could not visually distinguish the two species in the  
556 heterospecific pairs, but it appears likely that the short and immediate sucks were performed  
557 by *M. lignano* individuals, while the longer and delayed sucks were performed by *M. janickei*  
558 individuals. Interestingly, the suck behaviour seems to be a highly stereotypical behaviour,  
559 with the CVs being lower for suck duration than for copulation duration for each of the

560 mating pair types. This is similar to what was noted from earlier behaviour studies of  
561 *M. lignano* (Schärer et al. 2004).  
562 Whereas conspecific pairs of both species produced similar offspring numbers, heterospecific  
563 pairs gave rise to offspring relatively rarely, despite most pairs having copulated successfully,  
564 presumably due to postmating-prezygotic or postzygotic reproductive barriers. In our study,  
565 hybridization was symmetrical, with both species being able to inseminate and fertilize the  
566 other species. Interestingly, in none of the heterospecific replicates did both partners produce  
567 offspring. While this could point towards unilateral transfer of sperm during copulation, we  
568 cannot ascertain if this only occurs in heterospecific pairs or if conspecific pairs also show a  
569 similar pattern, as we collected only one partner for each conspecific pair. To the best of our  
570 knowledge this is the first study to have documented hybridization between species of the  
571 genus *Macrostomum*, and there is also very sparse information only about hybridization in  
572 free-living flatworms in general (Pala et al. 1982; Bullini 1985), while there is some more  
573 information about parasitic flatworms (Taylor 1970; Thèron 1989; Detwiler and Criscione  
574 2010; Itagaki et al. 2011; Henrich et al. 2013).

### 575 ***Experiment 2: Hybrid fertility***

576 While historically, hybrids have often been considered to be sterile and evolutionary dead-  
577 ends (see Mallet 2005), hybridization sometimes leads to viable and fertile offspring. In such  
578 cases, hybridization can serve as a mechanism for generating diversification, by creating  
579 adaptive variation and functional novelty in morphology and genotypes (Mallet 2005; Bonnet  
580 et al. 2017), a view that has been reinforced by the widespread presence of allopolyploidy  
581 among plants (Soltis and Soltis 1995; Soltis et al. 2015; Wendel et al. 2016). In our study,  
582 heterospecific matings between *M. lignano* and *M. janickei* resulted in the production of  
583 viable hybrids, which we could successfully backcross onto both parental species. Though our  
584 study demonstrates hybridisation between the two species, we currently have no evidence for

585 these species occurring in sympatry. *M. lignano* has previously been collected from locations  
586 in Greece and Italy, while *M. janickei* has to date only been collected from France (Schärer et  
587 al. n.d.; Zadesenets et al. 2016, 2017). Assuming this geographic distribution indicates  
588 absence of sympatric zones, it would follow that the observed reproductive trait divergence  
589 might not have occurred as a result of reinforcement of reproductive isolation. Thus, the  
590 differences in reproductive characters will not necessarily serve as reproductive barriers, and  
591 this could potentially explain our observed results.

592 Remarkably, both of our study species exhibit an unusual karyotype organization (Zadesenets  
593 et al. 2016), involving hidden tetraploidy and hexaploidy in *M. lignano* and *M. janickei*,  
594 respectively (likely as a result of a whole genome duplication event). Moreover, both species  
595 show additional chromosome number variation in the form of aneuploidies of the largest  
596 chromosome, also leading to other ploidy levels (Zadesenets et al. 2017). Interestingly,  
597 individuals with unusual karyotypes do not show behavioural or morphological abnormalities  
598 and reproduce successfully, at least in *M. lignano* (Zadesenets et al. 2016). The fact that we  
599 can obtain viable hybrids between the two species calls for studies of the resulting karyotypes  
600 of these F1 hybrids and the F2 backcrosses.

### 601 ***Experiment 3: Hybrid and parental species stylet morphology***

602 The parental species differed significantly in the morphology of their stylet, though their  
603 overall stylet size was similar. In contrast, the hybrids possessed a stylet that had a  
604 morphology that was intermediate between that of the parental species, but was distinctly  
605 larger in size, for which we currently have no explanation (as already mentioned above, these  
606 results need to be interpreted with some care, since the data used in this comparison stemmed  
607 from three separate experiments). A study in closely related species of damselflies had also  
608 shown that, despite differences in genitalia morphology, the species had incomplete  
609 mechanical isolation and could hybridize (Barnard et al. 2017). An interesting follow-up to

610 our study would be to use QTL mapping in order to identify which gene regions are involved  
611 in stylet formation and shape (Tanaka et al. 2015; Fujisawa et al. 2019; Hagen et al. 2019),  
612 which would help us understand genital evolution (Yassin 2016). This approach might,  
613 however, be rendered difficult due to the karyotype polymorphisms present in the two  
614 *Macrostomum* species.

#### 615 ***Experiment 4: Mate preference experiment***

616 Our mate preference experiment showed that there is some degree of assortative mating  
617 between *M. lignano* individuals, which appears to mostly stem from the higher mating rate of  
618 *M. lignano*. This is in line with our results from Experiment 1, where *M. lignano* conspecific  
619 pairs had shorter copulation latencies, shorter copulation durations and shorter copulation  
620 intervals compared to *M. janickei* conspecific pairs (Figure 1). Thus, mate choice in these two  
621 species seems to be governed mainly by behavioural characteristics, such as mating rate,  
622 rather than an explicit preference for a conspecific or heterospecific partner. A potential factor  
623 affecting mating rate could be sexual selection, for instance, in polygamous mating systems,  
624 sexual selection can select for persistent mating efforts, particularly in males, which in turn  
625 can lead to reproductive interference between the species (Gröning and Hochkirch 2008;  
626 Burdfield-Steel and Shuker 2011; Kyogoku 2015). Interestingly, a similar phenomenon has  
627 been observed in experimentally evolved populations of *Drosophila pseudoobscura* that  
628 experienced different sexual selection intensity regimes of either monogamy or polyandry  
629 (Snook et al. 2005; Debelle et al. 2014). A mate choice experiment showed that males from  
630 polyandrous populations had a higher probability of mating than those from monogamous  
631 populations (Debelle et al. 2016), potentially due to having evolved under strong male-male  
632 competition and hence initiating courtship faster and more frequently than monogamous  
633 males (Crudginton et al. 2010). Similarly, an experimental evolution study on a seed beetle,  
634 *Callosobruchus chinensis*, also showed that beetles evolved under a polygamous regime

635 caused stronger reproductive interference on a congener species (*C. maculatus*) than beetles  
636 evolved under a monogamous regime (Kyogoku and Sota 2017; Kyogoku et al. 2019). In  
637 addition to the above examples, multiple empirical studies have proposed a role of sexual  
638 selection in occurrence of reproductive interference between species (Kyogoku and Sota  
639 2015; Yassin and David 2016).

640 In our experiment, the over-representation of heterospecific matings in *M. janickei* could lead  
641 to asymmetric reproductive interference between these species. Though we did not explicitly  
642 investigate how fecundity is affected, it seems likely that *M. janickei* would pay a higher  
643 fitness cost compared to *M. lignano* in such a context. Future studies should explicitly  
644 investigate if and how mating rate differences can affect the fecundity of the species and  
645 whether the cost is symmetric for both species, or if *M. janickei* suffers more due to a reduced  
646 conspecific mating rate. Moreover, as we outlined above, while our study raises the  
647 interesting possibility of hybridization occurring in zones of secondary contact between the  
648 two species, we are currently not aware of any overlapping ranges of the two species (but this  
649 may largely be due to the lack of sampling effort). Considering their heterospecific  
650 interactions though, it might be difficult for the species to co-exist, since *M. lignano* might be  
651 expected to displace *M. janickei* from any overlapping zones due to potential asymmetric  
652 reproductive interference. Alternatively, selection for reinforcement of reproductive isolation  
653 might occur, leading to character displacement of the species in sympatric zones, such that  
654 heterospecific interactions are reduced.

## 655 ***Conclusions***

656 Our study shows that reproductive traits can evolve rapidly, even between closely related  
657 species, though they do not necessarily pose a reproductive barrier to hybridization. An  
658 interesting question that arises then is whether mating behaviour and genital morphology co-  
659 evolve or whether they diversify independently. A phylogenetic comparative study that looks

660 at the evolution of these reproductive traits in more species across the *Macrostomum* genus  
661 would help us answer these open questions. Moreover, using hybridization and techniques  
662 like QTL mapping, we could aim at understanding the genetic basis of rapidly evolving and  
663 diversifying reproductive traits like mating behaviour and genitalia, and in turn broaden our  
664 understanding of speciation in free-living flatworms, a highly species-rich group of  
665 simultaneous hermaphrodites.

666

## 667 **References**

- 668 Andersen, R. A., J. A. Berges, P. J. Harrison, and M. M. Watanabe. 2007. Recipes for  
669 Freshwater and Seawater Media. Pp. 429–538 in *Algal Culturing Techniques*. Elsevier.
- 670 Anthes, N., and N. K. Michiels. 2007. Reproductive morphology, mating behavior, and  
671 spawning ecology of cephalaspid sea slugs (Aglajidae and Gastropteridae). *Invertebr.*  
672 *Biol.* 126:335–365.
- 673 Arnqvist, G. 1998. Comparative evidence for the evolution of genitalia by sexual selection.  
674 *Nature* 393:784–786.
- 675 Arnqvist, G. 1997. The evolution of animal genitalia: Distinguishing between hypotheses by  
676 single species studies. *Biol. J. Linn. Soc.* 60:365–379.
- 677 Barnard, A. A., O. M. Fincke, M. A. McPeck, and J. P. Masly. 2017. Mechanical and tactile  
678 incompatibilities cause reproductive isolation between two young damselfly species.  
679 *Evolution* (N. Y). 71:2410–2427.
- 680 Billeter, J.-C., and M. F. Wolfner. 2018. Chemical Cues that Guide Female Reproduction in  
681 *Drosophila melanogaster*. *J. Chem. Ecol.* 44:750–769.
- 682 Blair, W. F. 1974. Character Displacement in Frogs. *Am. Zool.* 14:1119–1125.
- 683 Bonnet, T., R. Leblois, F. Rousset, and P. A. Crochet. 2017. A reassessment of explanations  
684 for discordant introgressions of mitochondrial and nuclear genomes. *Evolution* (N. Y).  
685 71:2140–2158.
- 686 Brown, W. L., and E. O. Wilson. 1956. Character Displacement. *Syst. Zool.* 5:49.
- 687 Bullini, L. 1985. Speciation by hybridization in animals. *Bolletino di Zool.* 52:121–137.
- 688 Burdfield-Steel, E. R., and D. M. Shuker. 2011. Reproductive interference. *Curr. Biol.*  
689 21:R450–R451.
- 690 Butlin, R., A. Debelle, C. Kerth, R. R. Snook, L. W. Beukeboom, R. F. Castillo Cajas, W.  
691 Diao, M. E. Maan, S. Paolucci, F. J. Weissing, L. van de Zande, A. Hoikkala, E.  
692 Geuverink, J. Jennings, M. Kankare, K. E. Knott, V. I. Tyukmaeva, C. Zoumadakis, M.  
693 G. Ritchie, D. Barker, E. Immonen, M. Kirkpatrick, M. Noor, M. C. Garcia, T. Schmitt,  
694 and M. Schilthuizen. 2012. What do we need to know about speciation? *Trends Ecol.*  
695 *Evol.* 27:27–39.
- 696 Butlin, R. K., and M. G. Ritchie. 1994. Mating behaviour and speciation. Pp. 43–79 in P.  
697 Slater and T. Halliday, eds. *Behaviour and evolution*. Cambridge University Press,  
698 Cambridge.
- 699 Canchola, J. A. 2017. Correct use of percent coefficient of variation (%CV) formula for log-  
700 transformed data. *MOJ Proteomics Bioinforma.*, doi: 10.15406/mojpb.2017.06.00200.
- 701 Chapman, T. 2001. Seminal fluid-mediated fitness traits in *Drosophila*. *Heredity* (Edinb).  
702 87:511–521.
- 703 Ciccotto, P. J., J. M. Gumm, and T. C. Mendelson. 2013. Male association preference for  
704 conspecifics in the redband darter, *Etheostoma luteovinctum* (Teleostei: Percidae) based  
705 on visual cues. *Copeia* 2013:154–159.
- 706 Coyne, J. A., and H. A. Orr. 2004. *Speciation*. Massachusetts:SinauerAssociates Sunderland.
- 707 Crudginton, H. S., S. Fellows, and R. R. Snook. 2010. Increased opportunity for sexual  
708 conflict promotes harmful males with elevated courtship frequencies. *J. Evol. Biol.*  
709 23:440–446.
- 710 Debelle, A., M. G. Ritchie, and R. R. Snook. 2014. Evolution of divergent female mating  
711 preference in response to experimental sexual selection. *Evolution* (N. Y). 68:2524–  
712 2533.
- 713 Debelle, A., M. G. Ritchie, and R. R. Snook. 2016. Sexual selection and assortative mating:  
714 an experimental test. *J. Evol. Biol.* 29:1307–1316.



- 715 Detwiler, J. T., and C. D. Criscione. 2010. An infectious topic in reticulate evolution:  
716 introgression and hybridization in animal parasites. *Genes (Basel)*. 1:102–123.
- 717 Devigili, A., J. L. Fitzpatrick, C. Gasparini, I. W. Ramnarine, A. Pilastro, and J. P. Evans.  
718 2018. Possible glimpses into early speciation: the effect of ovarian fluid on sperm  
719 velocity accords with post-copulatory isolation between two guppy populations. *J. Evol.*  
720 *Biol.* 31:66–74.
- 721 Eberhard, W. G. 1985. *Sexual Selection and Animal Genitalia*. Harvard University Press,  
722 Cambridge, MA and London, England.
- 723 Firman, R. C., C. Gasparini, M. K. Manier, and T. Pizzari. 2017. Postmating Female Control:  
724 20 Years of Cryptic Female Choice. *Trends Ecol. Evol.* 32:368–382.
- 725 Fujisawa, T., M. Sasabe, N. Nagata, Y. Takami, and T. Sota. 2019. Genetic basis of species-  
726 specific genitalia reveals role in species diversification. *Sci. Adv.* 5:eaav9939.
- 727 Garlovsky, M. D., and R. R. Snook. 2018. Persistent postmating, prezygotic reproductive  
728 isolation between populations. *Ecol. Evol.* 8:9062–9073.
- 729 Gleason, J. M., and M. G. Ritchie. 1998. Evolution of courtship song and reproductive  
730 isolation in the *Drosophila willistoni* species complex: do sexual signals diverge the  
731 most quickly? *Evolution (N. Y.)*. 52:1493.
- 732 Grether, G. F., K. S. Peiman, J. A. Tobias, and B. W. Robinson. 2017. Causes and  
733 Consequences of Behavioral Interference between Species. *Trends Ecol. Evol.* 32:760–  
734 772.
- 735 Gröning, J., and A. Hochkirch. 2008. Reproductive Interference Between Animal Species. *Q.*  
736 *Rev. Biol.* 83:257–282.
- 737 Hagen, J. F. D., C. C. Mendes, A. Blogg, A. Payne, K. M. Tanaka, P. Gaspar, J. Figueras  
738 Jimenez, M. Kittelmann, A. P. McGregor, and M. D. S. Nunes. 2019. tartan underlies the  
739 evolution of *Drosophila* male genital morphology. *Proc. Natl. Acad. Sci.* 116:19025–  
740 19030.
- 741 Henrich, T., D. P. Benesh, and M. Kalbe. 2013. Hybridization between two cestode species  
742 and its consequences for intermediate host range. *Parasit. Vectors* 6:33.
- 743 Herring, K., and P. Verrell. 1996. Sexual incompatibility and geographical variation in mate  
744 recognition systems: tests in the salamander *Desmognathus ochrophaeus*. *Anim. Behav.*  
745 52:279–287.
- 746 Itagaki, T., M. Ichinomiya, K. Fukuda, S. Fussyuku, and C. Carmona. 2011. Hybridization  
747 experiments indicate incomplete reproductive isolating mechanism between *Fasciola*  
748 *hepatica* and *Fasciola gigantica*. *Parasitology* 138:1278–1284.
- 749 Janicke, T., L. Marie-Orleach, K. De Mulder, E. Berezikov, P. Ladurner, D. B. Vizoso, and L.  
750 Schärer. 2013. Sex allocation adjustment to mating group size in a simultaneous  
751 hermaphrodite. *Evolution (N. Y.)*. 67:3233–3242.
- 752 Janicke, T., M. G. Ritchie, E. H. Morrow, and L. Marie-Orleach. 2018. Sexual selection  
753 predicts species richness across the animal kingdom. *Proc. R. Soc. B Biol. Sci.*  
754 285:20180173.
- 755 Janicke, T., P. Sandner, and L. Schärer. 2011. Determinants of female fecundity in a  
756 simultaneous hermaphrodite: the role of polyandry and food availability. *Evol. Ecol.*  
757 25:203–218.
- 758 Janicke, T., and L. Schärer. 2009. Determinants of mating and sperm-transfer success in a  
759 simultaneous hermaphrodite. *J. Evol. Biol.* 22:405–415.
- 760 Kelly, D. A., and B. C. Moore. 2016. The Morphological Diversity of Intromittent Organs:  
761 An Introduction to the Symposium. *Integr. Comp. Biol.* 56:630–634.
- 762 King, R. B., R. C. Jadin, M. Grue, and H. D. Walley. 2009. Behavioural correlates with  
763 hemipenis morphology in New World natricine snakes. *Biol. J. Linn. Soc.* 98:110–120.
- 764 Klappert, K., D. Mazzi, A. Hoikkala, and M. G. Ritchie. 2007. Male courtship song and



- 765 female preference variation between phylogeographically distinct populations of  
766 *Drosophila montana*. *Evolution* (N. Y). 61:1481–1488.
- 767 Kraaijeveld, K., F. J. L. Kraaijeveld-Smit, and M. E. Maan. 2011. Sexual selection and  
768 speciation: the comparative evidence revisited. *Biol. Rev.* 86:367–377.
- 769 Kyogoku, D. 2015. Reproductive interference: ecological and evolutionary consequences of  
770 interspecific promiscuity. *Popul. Ecol.* 57:253–260.
- 771 Kyogoku, D., M. Kondoh, and T. Sota. 2019. Does past evolutionary history under different  
772 mating regimes influence the demographic dynamics of interspecific competition? *Ecol.*  
773 *Evol.* 9:8616–8624.
- 774 Kyogoku, D., and T. Sota. 2015. Exaggerated male genitalia intensify interspecific  
775 reproductive interference by damaging heterospecific female genitalia. *J. Evol. Biol.*  
776 28:1283–1289.
- 777 Kyogoku, D., and T. Sota. 2017. The evolution of between-species reproductive interference  
778 capability under different within-species mating regimes. *Evolution* (N. Y). 71:2721–  
779 2727.
- 780 Lackey, A. C. R., and J. W. Boughman. 2017. Evolution of reproductive isolation in  
781 stickleback fish. *Evolution* (N. Y). 71:357–372.
- 782 Ladurner, P., L. Schärer, W. Salvenmoser, and R. M. Rieger. 2005. A new model organism  
783 among the lower Bilateria and the use of digital microscopy in taxonomy of meiobenthic  
784 Platyhelminthes: *Macrostomum lignano*, n. sp. (Rhabditophora, Macrostomorpha). *J.*  
785 *Zool. Syst. Evol. Res.* 43:114–126.
- 786 Lodi, M., and J. M. Koene. 2016. On the effect specificity of accessory gland products  
787 transferred by the love-dart of land snails. *BMC Evol. Biol.* 16:104.
- 788 Mallet, J. 2005. Hybridization as an invasion of the genome. *Trends Ecol. Evol.* 20:229–237.
- 789 Manier, M. K., S. Lüpold, J. M. Belote, W. T. Starmer, K. S. Berben, O. Ala-Honkola, W. F.  
790 Collins, and S. Pitnick. 2013. Postcopulatory sexual selection generates speciation  
791 phenotypes in *Drosophila*. *Curr. Biol.* 23:1853–1862.
- 792 Marie-Orleach, L., T. Janicke, and L. Schärer. 2013. Effects of mating status on copulatory  
793 and postcopulatory behaviour in a simultaneous hermaphrodite. *Anim. Behav.* 85:453–  
794 461.
- 795 Marie-Orleach, L., T. Janicke, D. B. Vizoso, P. David, and L. Schärer. 2016. Quantifying  
796 episodes of sexual selection: Insights from a transparent worm with fluorescent sperm.  
797 *Evolution* (N. Y). 70:314–328.
- 798 Marie-Orleach, L., T. Janicke, D. B. Vizoso, M. Eichmann, and L. Schärer. 2014. Fluorescent  
799 sperm in a transparent worm: validation of a GFP marker to study sexual selection. *BMC*  
800 *Evol. Biol.* 14:148.
- 801 Masly, J. P. 2012. 170 Years of “Lock-and-Key”: Genital Morphology and Reproductive  
802 Isolation. *Int. J. Evol. Biol.* 2012:1–10.
- 803 Mayr, E. 1942. *Systematics and the Origin of Species*. New York: Columbia University Press.
- 804 McDonald, J. H. 2014. *Handbook of Biological Statistics* (3rd ed.). Sparky House Publ. Balt.  
805 *Maryl.*, doi: 10.1017/CBO9781107415324.004.
- 806 Morrow, E. H., T. E. Pitcher, and G. Arnqvist. 2003. No evidence that sexual selection is an  
807 “engine of speciation” in birds. *Ecol. Lett.* 6:228–234.
- 808 Mouton, S., M. Willems, B. P. Braeckman, B. Egger, P. Ladurner, L. Schärer, and G.  
809 Borgonie. 2009. The free-living flatworm *Macrostomum lignano*: A new model  
810 organism for ageing research. *Exp. Gerontol.* 44:243–249. Elsevier Inc.
- 811 Ostevik, K. L., R. L. Andrew, S. P. Otto, and L. H. Rieseberg. 2016. Multiple reproductive  
812 barriers separate recently diverged sunflower ecotypes. *Evolution* (N. Y). 70:2322–2335.
- 813 Pala, M., S. Casu, and N. G. Lepori. 1982. Stabilized Natural Interspecific Hybrid Population  
814 of the Fresh Water Planarians *Dugesia Gonocephala* S. L. (Turbellaria, Tricladida).

- 815 Caryologia 35:247–256.
- 816 Patlar, B., M. Weber, and S. A. Ramm. 2019. Genetic and environmental variation in  
817 transcriptional expression of seminal fluid proteins. *Heredity (Edinb)*. 122:595–611.
- 818 Perry, J. C., L. Sirot, and S. Wigby. 2013. The seminal symphony: how to compose an  
819 ejaculate. *Trends Ecol. Evol.* 28:414–422.
- 820 Pfennig, K. S., and D. W. Pfennig. 2009. Character displacement: ecological and reproductive  
821 responses to a common evolutionary problem. *Q. Rev. Biol.* 84:253–76.
- 822 Puniamoorthy, N. 2014. Behavioural barriers to reproduction may evolve faster than sexual  
823 morphology among populations of a dung fly (Sepsidae). *Anim. Behav.* 98:139–148.  
824 Elsevier Ltd.
- 825 Puniamoorthy, N., M. R. B. Ismail, D. S. H. Tan, and R. Meier. 2009. From kissing to belly  
826 stridulation: comparative analysis reveals surprising diversity, rapid evolution, and much  
827 homoplasmy in the mating behaviour of 27 species of sepsid flies (Diptera: Sepsidae). *J.*  
828 *Evol. Biol.* 22:2146–56.
- 829 Puniamoorthy, N., M. Kotrba, and R. Meier. 2010. Unlocking the “Black box”: internal  
830 female genitalia in Sepsidae (Diptera) evolve fast and are species-specific. *BMC Evol.*  
831 *Biol.* 10:275.
- 832 Ramm, S. A., B. Lengerer, R. Arbore, R. Pjeta, J. Wunderer, A. Giannakara, E. Berezikov, P.  
833 Ladurner, and L. Schärer. 2019. Sex allocation plasticity on a transcriptome scale:  
834 Socially sensitive gene expression in a simultaneous hermaphrodite. *Mol. Ecol.*  
835 *mec.15077*.
- 836 Ritchie, M. G., E. J. Halsey, and J. M. Gleason. 1999. *Drosophila* song as a species-specific  
837 mating signal and the behavioural importance of Kyriacou and Hall cycles in *D.*  
838 *melanogaster* song. *Anim. Behav.* 58:649–657.
- 839 Sato, Y., H. Sakamoto, T. Gotoh, Y. Saito, J.-T. Chao, M. Egas, and A. Mochizuki. 2018.  
840 Patterns of reproductive isolation in a haplodiploid - strong post-mating, prezygotic  
841 barriers among three forms of a social spider mite. *J. Evol. Biol.* 31:866–881.
- 842 Schärer, L., J. N. Brand, P. Singh, K. S. Zadesenets, C.-P. Stelzer, and G. Viktorin. (in press).  
843 A phylogenetically-informed search for an alternative *Macrostomum* model species, with  
844 notes on taxonomy, mating behaviour, karyology and genome size. *J. Zool. Syst. Evol.*  
845 *Res.*, doi: 10.1111/jzs.12344.
- 846 Schärer, L., G. Joss, and P. Sandner. 2004. Mating behaviour of the marine turbellarian  
847 *Macrostomum* sp.: these worms suck. *Mar. Biol.* 145:373–380.
- 848 Schärer, L., and P. Ladurner. 2003. Phenotypically plastic adjustment of sex allocation in a  
849 simultaneous hermaphrodite. *Proc. R. Soc. B Biol. Sci.* 270:935–941.
- 850 Schärer, L., D. T. J. Littlewood, A. Waeschenbach, W. Yoshida, and D. B. Vizoso. 2011.  
851 Mating behavior and the evolution of sperm design. *Proc. Natl. Acad. Sci.* 108:1490–  
852 1495.
- 853 Schwenke, R. A., B. P. Lazzaro, and M. F. Wolfner. 2016. Reproduction–Immunity Trade-  
854 Offs in Insects. *Annu. Rev. Entomol.* 61:239–256.
- 855 Servedio, M. R., and M. A. F. Noor. 2003. The Role of Reinforcement in Speciation: Theory  
856 and Data. *Annu. Rev. Ecol. Evol. Syst.* 34:339–364.
- 857 Shuker, D. M., and E. R. Burdfield-Steel. 2017. Reproductive interference in insects. *Ecol.*  
858 *Entomol.* 42:65–75.
- 859 Singh, P., N. Vellnow, and L. Schärer. 2019. Variation in sex allocation plasticity in three  
860 closely related flatworm species. *Ecol. Evol.* ece3.5566.
- 861 Snook, R. R., A. Robertson, H. S. Crudgington, and M. G. Ritchie. 2005. Experimental  
862 Manipulation of Sexual Selection and the Evolution of Courtship Song in *Drosophila*  
863 *pseudoobscura*. *Behav. Genet.* 35:245–255.
- 864 Soltis, D. E., and P. S. Soltis. 1995. The dynamic nature of polyploid. *Proc. Natl. Acad. Sci.*

- 865 92:8089–8091.
- 866 Soltis, P. S., D. B. Marchant, Y. Van de Peer, and D. E. Soltis. 2015. Polyploidy and genome  
867 evolution in plants. *Curr. Opin. Genet. Dev.* 35:119–125.
- 868 Souidi, S., K. Reinhold, and L. Engqvist. 2016. Strong cryptic prezygotic isolation despite lack  
869 of behavioral isolation between sympatric host races of the leaf beetle *Lochmaea*  
870 *capreae*. *Evolution* (N. Y). 70:2889–2898.
- 871 Swanson, W. J., and V. D. Vacquier. 2002. The rapid evolution of reproductive proteins. *Nat.*  
872 *Rev. Genet.* 3:137–144.
- 873 Tanaka, K. M., C. Hopfen, M. R. Herbert, C. Schlotterer, D. L. Stern, J. P. Masly, A. P.  
874 McGregor, and M. D. S. Nunes. 2015. Genetic Architecture and Functional  
875 Characterization of Genes Underlying the Rapid Diversification of Male External  
876 Genitalia Between *Drosophila simulans* and *Drosophila mauritiana*. *Genetics* 200:357–  
877 369.
- 878 Taylor, M. G. 1970. Hybridisation Experiments on Five Species of African *Schistosomes*. *J.*  
879 *Helminthol.* 44:253–314.
- 880 Thèron, A. 1989. Hybrids between *Schistosoma mansoni* and *S. rodhaini*: characterization  
881 by cercarial emergence rhythms. *Parasitology* 99:225–228.
- 882 Turissini, D. A., J. A. McGirr, S. S. Patel, J. R. David, and D. R. Matute. 2018. The rate of  
883 evolution of postmating-prezygotic reproductive isolation in *Drosophila*. *Mol. Biol.*  
884 *Evol.* 35:312–334.
- 885 Vellnow, N., L. Marie-Orleach, K. S. Zadesenets, and L. Schärer. 2018. Bigger testes increase  
886 paternity in a simultaneous hermaphrodite, independently of the sperm competition  
887 level. *J. Evol. Biol.* 31:180–196.
- 888 Vizoso, D. B., G. Rieger, and L. Schärer. 2010. Goings-on inside a worm: Functional  
889 hypotheses derived from sexual conflict thinking. *Biol. J. Linn. Soc.* 99:370–383.
- 890 Weber, M., J. Wunderer, B. Lengerer, R. Pjeta, M. Rodrigues, L. Schärer, P. Ladurner, and S.  
891 A. Ramm. 2018. A targeted in situ hybridization screen identifies putative seminal fluid  
892 proteins in a simultaneously hermaphroditic flatworm. *BMC Evol. Biol.* 18:81.
- 893 Wendel, J. F., S. A. Jackson, B. C. Meyers, and R. A. Wing. 2016. Evolution of plant genome  
894 architecture. *Genome Biol.* 17:37.
- 895 Williams, T. H., and T. C. Mendelson. 2010. Behavioral Isolation Based on Visual Signals in  
896 a Sympatric Pair of Darter Species. *Ethology* 116:1038–1049.
- 897 Yassin, A. 2016. Unresolved questions in genitalia coevolution: bridging taxonomy,  
898 speciation, and developmental genetics. *Org. Divers. Evol.* 16:681–688.
- 899 Yassin, A., and J. R. David. 2016. Within-species reproductive costs affect the asymmetry of  
900 satyrization in *Drosophila*. *J. Evol. Biol.* 29:455–460.
- 901 Zadesenets, K. S., L. Schärer, and N. B. Rubtsov. 2017. New insights into the karyotype  
902 evolution of the free-living flatworm *Macrostomum lignano* (Platyhelminthes,  
903 Turbellaria). *Sci. Rep.* 7:6066.
- 904 Zadesenets, K. S., D. B. Vizoso, A. Schlatter, I. D. Konopatskaia, E. Berezikov, L. Schärer,  
905 and N. B. Rubtsov. 2016. Evidence for Karyotype Polymorphism in the Free-Living  
906 Flatworm, *Macrostomum lignano*, a Model Organism for Evolutionary and  
907 Developmental Biology. *PLoS One* 11:e0164915.
- 908 Zelditch, M. L., D. L. Swiderski, H. D. Sheets, and W. L. Fink. 2004. Geometric  
909 morphometrics for biologists: a primer. Elsevier Acad. Press San Diego.
- 910 Zhou, M., E. R. Loew, and R. C. Fuller. 2015. Sexually asymmetric colour-based species  
911 discrimination in orangethroat darters. *Anim. Behav.* 106:171–179.
- 912
- 913
- 914

915 **Figures**

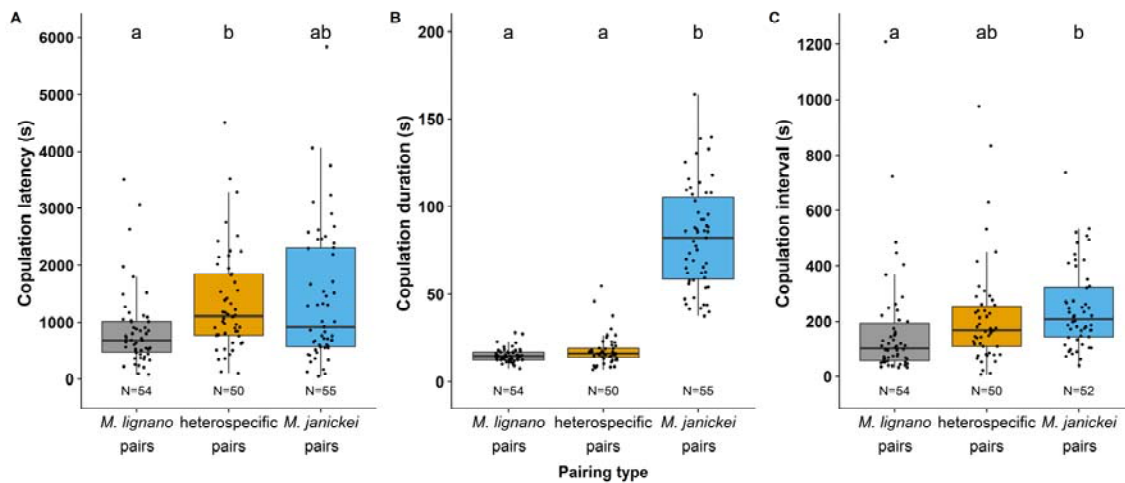

916  
917 Figure 1. Boxplots of the a) copulation latency, b) (average) copulation duration, and c)  
918 (average) copulation interval of the three pairing types. Different letters denote significantly  
919 different effects inferred from Tukey HSD post-hoc tests. The boxplots display the 25th  
920 percentile, median, and 75th percentile and the whiskers represent the 5th and the 95th  
921 percentiles of the raw data, but note that log-transformed data was used for statistical analysis  
922 of all variables shown here. Sample sizes are given at the bottom of the plots.

923

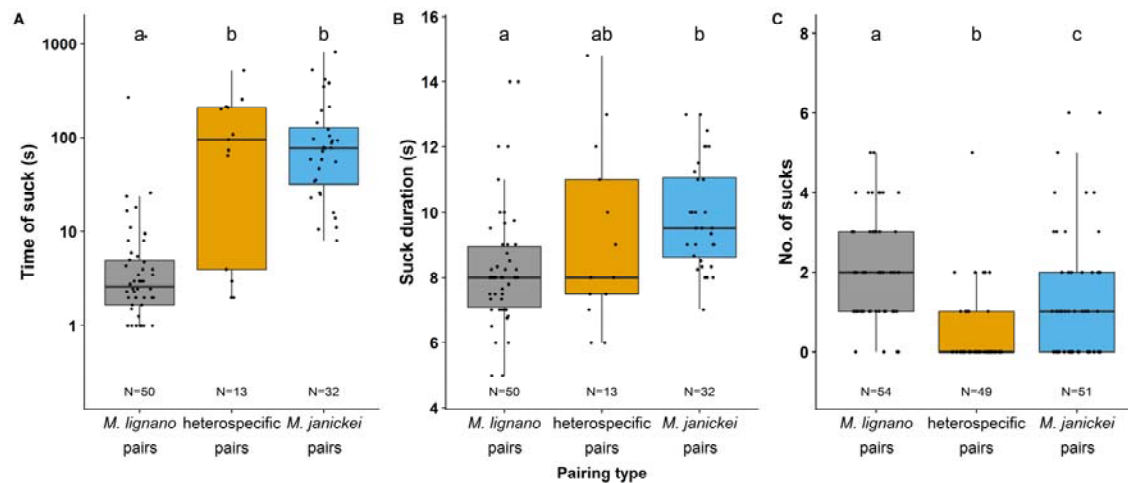

924  
925 Figure 2. Boxplots of the a) (average) time of suck (after copulation), b) (average) suck  
926 duration, and c) number of sucks of the three pairing types (recall that we here only consider  
927 pairs that copulated at least 5 times). Different letters denote significantly different effects  
928 inferred from Tukey HSD post-hoc tests (for a and b) or Mann–Whitney–Wilcoxon tests with  
929 Bonferroni correction (for c). The boxplots display the 25th percentile, median, and 75th  
930 percentile and the whiskers represent the 5th and the 95th percentiles of the log-transformed  
931 data (for a) and the raw data for (b and c), but note that log-transformed data was used for  
932 statistical analysis (for a and b). We added 1 to each data point for time of suck before log-  
933 transforming to avoid infinite values (see text for details). Sample sizes are given at the  
934 bottom of the plots.

935

936

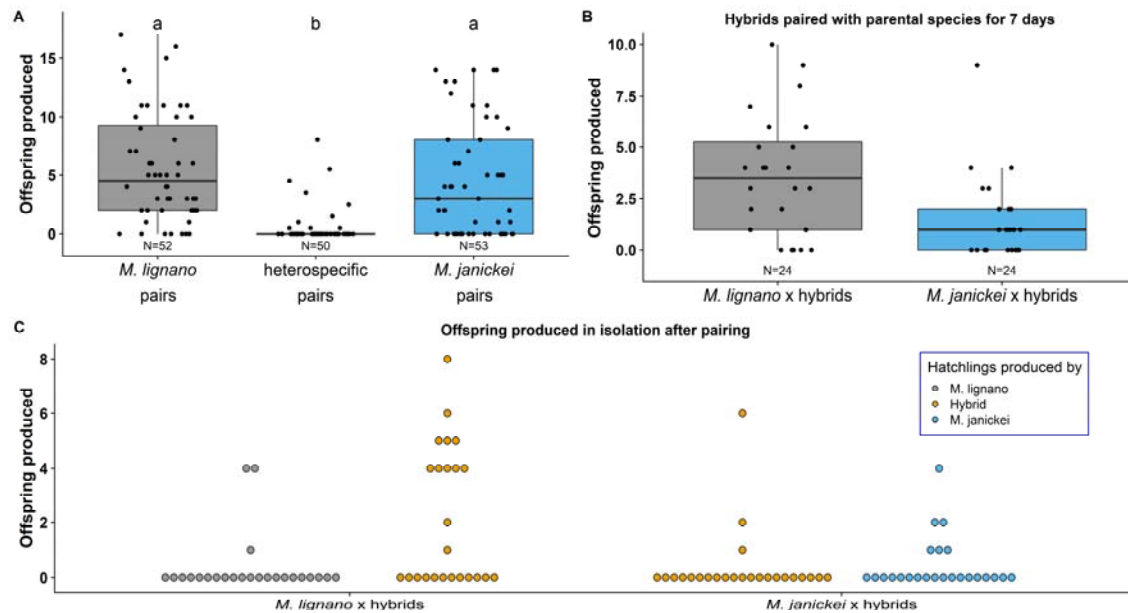

937

938 Figure 3. Plot of F2 hybrid offspring produced (female fecundity) a) by the three pairing types  
939 in Experiment 1; b) in the wells where the F1 hybrids were paired with an individual of one of  
940 their parental species for 7 days, and c) post-pairing isolated hybrid and parental individuals  
941 in Experiment 2. The boxplots in a) and b) display the 25th percentile, median, and 75th  
942 percentile and the whiskers represent the 5th and the 95th percentiles of the raw data, while c)  
943 is a dotplot. Note that in c) each backcrossed pair is represented twice as each pair comprises  
944 a hybrid and a parental species individual, so the replicates are not independent and the figure  
945 is only for visualisation. Sample sizes are given at the bottom of the plots in a) and b).

946



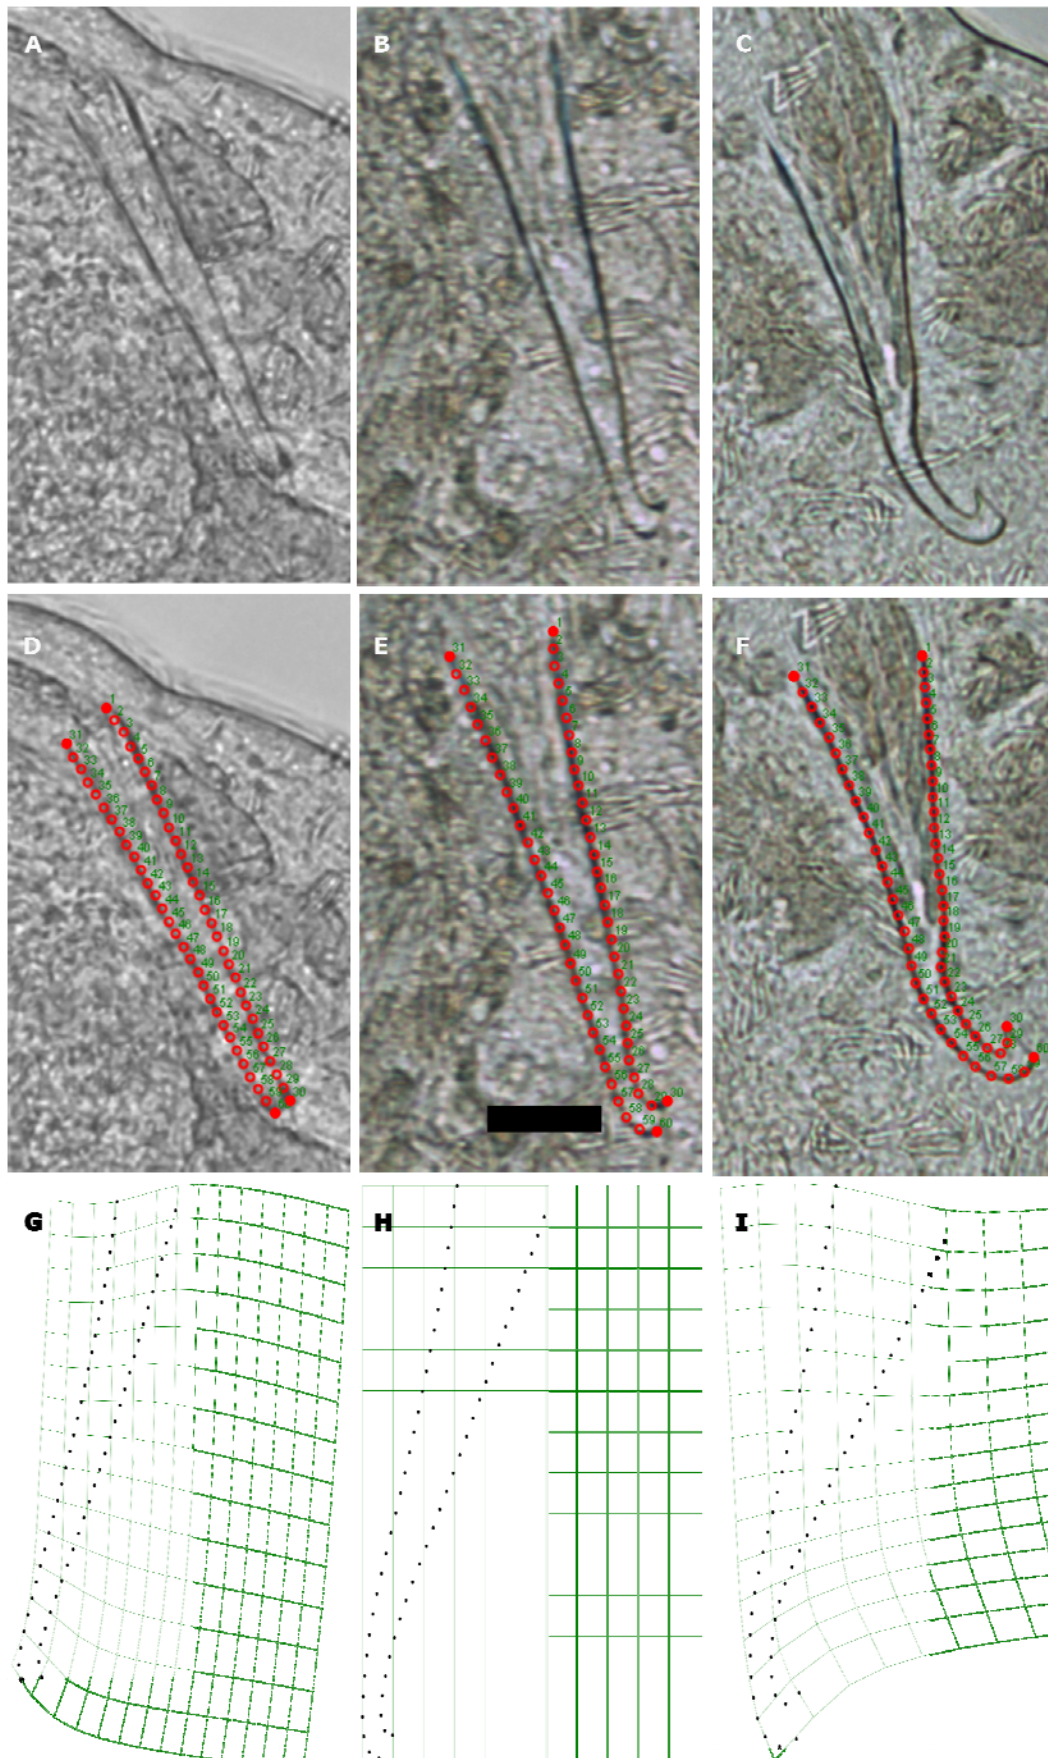

948 Figure 4. Morphology and geometric morphometrics of the stylet. Micrographs of the stylet of  
949 an individual a) *M. lignano*, b) F1 hybrid, and c) *M. janickei*. The placement of 60 landmarks  
950 along the stylet of an individual d) *M. lignano*, e) F1 hybrid and f) *M. janickei*. Note that we  
951 placed four fixed landmarks (filled red circles), two on the stylet base and two on the stylet  
952 tip, and 28 equally spaced sliding semi-landmarks (empty red circles) along each curved side  
953 of the stylet. The numbers indicate the order in which the landmarks were placed (note that  
954 the seminal vesicles always are to the left of the stylet). Visualization of thin-plate splines of  
955 the stylet derived from relative warp score analysis. Each panel shows the visualization for  
956 the mean relative warp score 1 (RWS1) of individuals of g) *M. lignano*, h) the F1 hybrids and  
957 i) *M. janickei*. Thus, in general *M. lignano* has a relatively straight stylet tip and *M. janickei*  
958 has a stylet tip that curves drastically, while the hybrids have intermediate curvature. The  
959 scale bar in e) represents 20  $\mu\text{m}$ , and is applicable to all photomicrographic images.

960



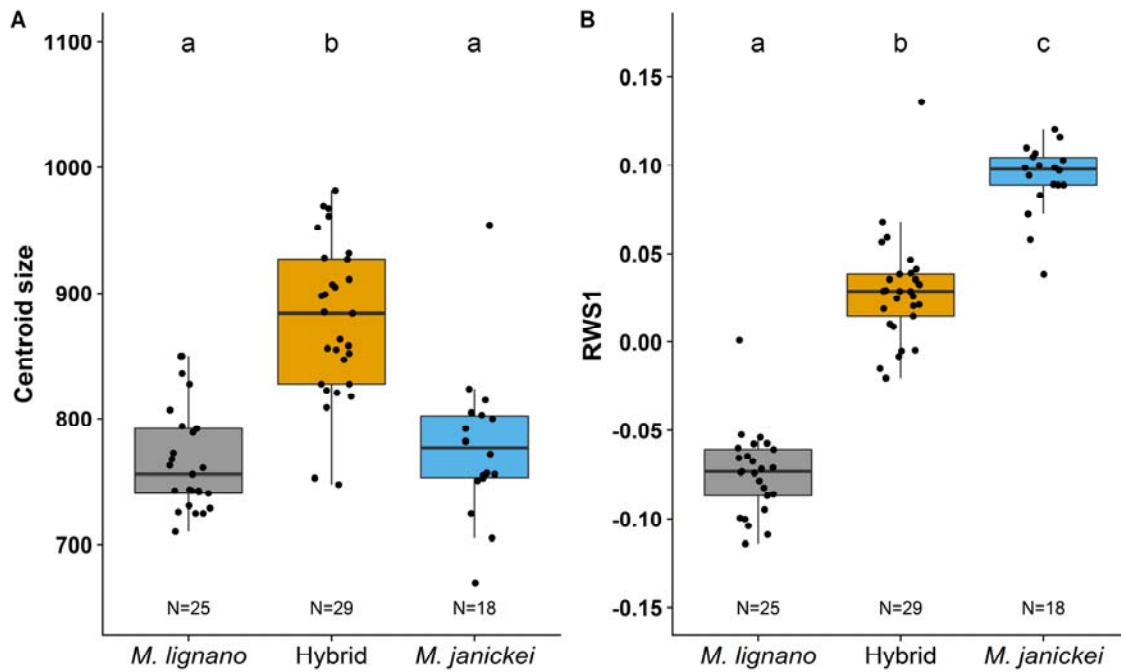

961

962 Figure 5 Boxplot for a) centroid size and b) relative warp score 1 (RWS1) of the stylets of  
963 *M. lignano*, F1 hybrid and *M. janickei* worms. Different letters denote significantly different  
964 effects inferred from Tukey HSD post-hoc tests. The boxplots display the 25th percentile,  
965 median, and 75th percentile and the whiskers represent the 5th and the 95th percentiles of the  
966 raw data. Sample sizes are given at the bottom of the plots.

967

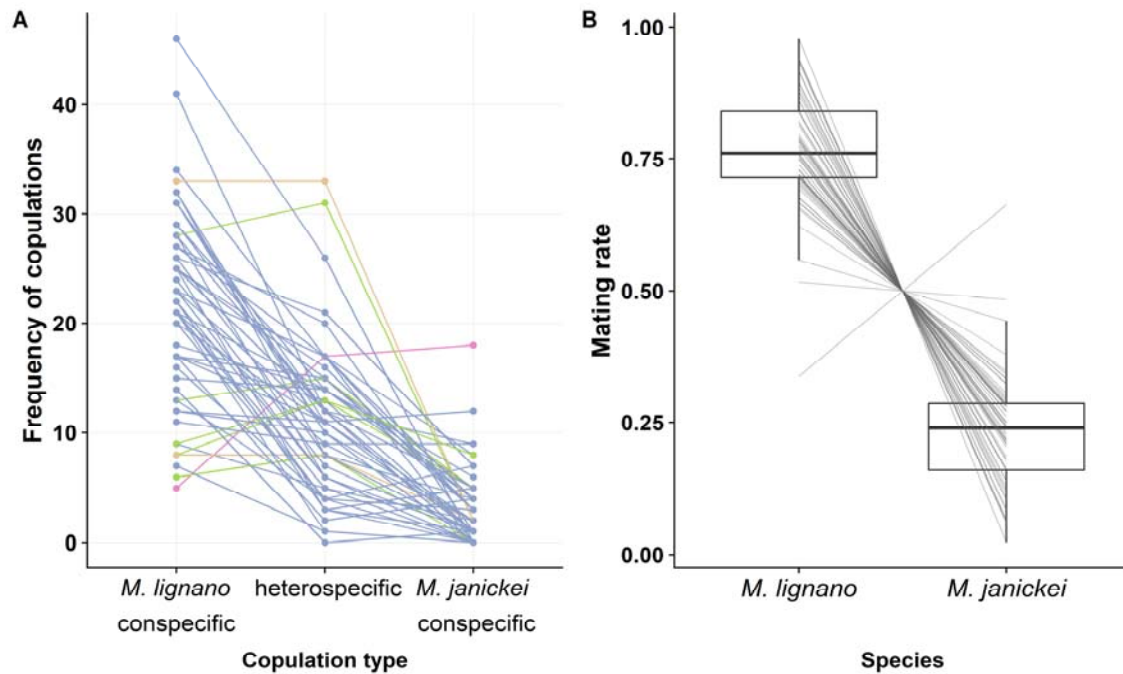

968  
969

970 Figure 6. a) Frequency of *M. lignano* conspecific, heterospecific, and *M. janickei* conspecific  
971 copulations. Each line connects values obtained from the same drop. The different colours  
972 help to visualise which copulation type had the highest frequency in a drop (blue, *M. lignano*  
973 conspecific; green, heterospecific; pink, *M. janickei* conspecific; orange, same in *M. lignano*  
974 conspecific and heterospecific), b) Boxplot of mating rate of *M. lignano* and *M. janickei*. The  
975 boxplots display the 25th percentile, median, and 75th percentile and the whiskers represent  
976 the 5th and the 95th percentiles of the raw data. Each line connects values obtained from the  
977 same drop.

978

979 Table 1. The coefficient of variation (CV) of each pairing type for all behaviours. For most  
980 behaviours the heterospecific pairs had the highest CV.

| behaviour           | <i>M. lignano</i> pairs | heterospecific pairs | <i>M. janickei</i> pairs |
|---------------------|-------------------------|----------------------|--------------------------|
| copulation latency  | 86                      | 88                   | 127                      |
| copulation duration | 27                      | 44                   | 39                       |
| copulation interval | 100                     | 116                  | 69                       |
| time of suck        | 234                     | 810                  | 175                      |
| suck duration       | 21                      | 29                   | 16                       |
| No. of sucks        | 66                      | 209                  | 120                      |

981
